## Two-dose Technique to Create an Individual Dose-Response Curve for Atracurium

Olli A. Meretoja, M.D.,\* Kari Wirtavuori, M.D.†

While monitoring the thenar EMG response to ulnar nerve stimulation, the authors gave either 105, 150, 210, or 300  $\mu\text{g}/\text{kg}$  of atracurium to 60 patients. The maximal neuromuscular responses were plotted on a log-probit paper. The individual second dose required to produce 95% neuromuscular block (NMB) was estimated from a graph drawn on the paper. The maximal response following this second dose was then plotted. The mean maximal response following the second atracurium dose was 95.5% (SD range, 92.6-97.4%) NMB. The two dose-response points thus acquired resulted in the individual two-dose dose-response curve. The  $\text{ED}_{50}$  and  $\text{ED}_{95}$  and slope of the two-dose dose-response curve were compared with the single-dose dose-response curve. The average  $\text{ED}_{50}$  and  $\text{ED}_{95}$  determined by the two-dose and the single-dose techniques were nearly identical [160  $\mu\text{g}/\text{kg}$  (SD range, 126-201  $\mu\text{g}/\text{kg}$ ) vs. 164  $\mu\text{g}/\text{kg}$  (SD range, 150-179  $\mu\text{g}/\text{kg}$ ) and 302  $\mu\text{g}/\text{kg}$  (SD range, 251-363  $\mu\text{g}/\text{kg}$ ) vs. 336  $\mu\text{g}/\text{kg}$  (SD range, 274-411  $\mu\text{g}/\text{kg}$ ) respectively]. Also, the slopes of the curves were similar [6.2 (SD range, 5.2-7.2) vs. 5.4 (SD range, 4.5-6.4) probit/log]. It is therefore possible to construct an individual dose-response curve for atracurium within 7-9 min and to determine individual pharmacodynamic characteristics of atracurium from this curve. (Key words: Measurement techniques: neuromuscular blockade. Neuromuscular relaxants: atracurium. Pharmacodynamics.)

IN MOST STUDIES describing the use of the cumulative dose technique to determine the potency of atracurium or vecuronium, the  $\text{ED}_{95}$  is greater with the cumulative technique than with the single-dose method.<sup>1-4</sup> This occurs because it is not possible to prevent elimination of some of the earliest doses of these relaxants by the time the maximum response occurs following the final cumulative dose. However, single-dose dose-response curves, determined by log-probit analysis in adults and children, have been found to be parallel for atracurium, vecuronium, pancuronium, and *d*-tubocurarine (*d*Tc) (the slopes range from 6.0 to 6.8 probit/log).<sup>3,5-8</sup> We therefore speculated that it should be possible to create an individual dose-response curve by using only one predetermined dose and another individually calculated incremental dose to achieve the desired final level of neuromuscular blockade (NMB). To test this hypothesis, we studied in 60 pediatric patients a two-dose dose-response technique for atracurium and compared the slope, the  $\text{ED}_{50}$ , and  $\text{ED}_{95}$

values with those obtained using the conventional single-bolus dose technique.

### Materials and Methods

Sixty ASA Physical Status 1-2 patients between 2 and 10 yr of age (mean age, 6.1 yr, body weight of 24.3 kg, and body surface area of 0.88  $\text{m}^2$ ) who were undergoing elective surgery were studied. The study protocol was approved by the Ethical Committee of the Children's Hospital, University of Helsinki. The patients had no diseases or medications known to affect neuromuscular function. They were premedicated with 0.07 mg/kg of oral flunitrazepam. Induction of general anesthesia was carried out (after glycopyrrolate 5  $\mu\text{g}/\text{kg}$ ) with fentanyl 3  $\mu\text{g}/\text{kg}$  and thiopental 3-4 mg/kg. Ventilation was then manually controlled with nitrous oxide in oxygen 2:1 to maintain end-tidal  $\text{CO}_2$  at 5.0-5.5%. Normothermia was maintained. No volatile inhalational agent was used.

Two surface electrodes were applied over the ulnar nerve near the wrist: one over the adductor pollicis muscle on the thenar eminence and one on the proximal area of the middle finger. The forearm and the fingers were supported by a dorsal splint, and the neuromuscular monitor (Relaxograph, Datex, Helsinki, Finland) was calibrated. The ulnar nerve was stimulated supramaximally with train-of-four stimuli (2 Hz every 20 s) and the evoked compound electromyogram (EMG) was recorded. The calibration was continued until constant responses were recorded for at least 3 min.

The first 30 patients were given 150  $\mu\text{g}/\text{kg}$  of atracurium. The ensuing NMB was monitored until no change in successive EMG responses was noticed (fig. 1).<sup>5</sup> This maximal effect was plotted on log-probit paper on which parallel lines with slopes of 6.5 probit/log had been drawn (fig. 2). From this graph, an individual incremental dose that would produce 95% NMB was estimated by assuming that the individual dose-response curves are parallel and that the slopes are 6.5 probit/log. This incremental second dose was then given, and the maximum NMB was recorded (fig. 1). This maximum effect was then plotted on the log-probit paper. The line drawn *via* the two dose-response points is the individual two-dose dose-response curve.

From the data derived from the first part of the study, the average atracurium dose-response curve of these 30 patients was divided by four cut points into three equal parts to cover that portion of the curve where responses

\* Associate Professor of Anesthesiology.

† Consultant in Anesthesiology.

Received from the Department of Anesthesiology, Children's Hospital, University of Helsinki, Helsinki, Finland. Accepted for publication December 12, 1988.

Address reprint requests to Dr. Meretoja: Department of Anesthesiology, Royal Children's Hospital, Melbourne, Victoria 3052, Australia.

lay between 5% and 95% NMB. The division was performed so that the response to 150  $\mu\text{g}/\text{kg}$  constituted one of the points. Consequently, doses of 105, 150, 210, and 300  $\mu\text{g}/\text{kg}$  on the horizontal axis became the cut points. These doses are at equal intervals on a logarithmic scale. The remaining 30 patients were then given either 105, 210, or 300  $\mu\text{g}/\text{kg}$  of atracurium in random order. The maximum NMB following these doses was recorded, and the patients were given a second dose to achieve the desired final 95% NMB. The estimate of the magnitude of the second dose was based on the same graph as in the first part of the study. The individuals who manifested a  $>90\%$  NMB following the initial dose of atracurium did not receive additional doses.

The maximum NMB was calculated after both doses of atracurium. An individual two-dose dose-response curve was drawn by log-probit transformation and the individual slope,  $\text{ED}_{50}$ , and  $\text{ED}_{95}$  determined by least-square linear regression analysis. The single-dose dose-response curve was drawn by log-probit transformation of the maximum NMB after the first doses of atracurium (*i.e.*, 105, 150, 210, and 300  $\mu\text{g}/\text{kg}$ ).<sup>9</sup> The effective doses were calculated on the basis of body weight ( $\mu\text{g}/\text{kg}$ ) and body surface area ( $\text{mg}/\text{m}^2$ ).

ANOVA, with the Welch modification in cases of unequal variances, was employed for statistical analysis (BMDP Statistical Software 7D of 1987, Berkeley, California). The Tukey studentized range method was used to compare the mean slope and  $\text{ED}_{50}$  and  $\text{ED}_{95}$  values of the two-dose dose-response groups. The method described by Litchfield and Wilcoxon was used to compare the  $\text{ED}_{50}$ ,  $\text{ED}_{95}$  and the slope of the single-dose dose-response curve with the mean values of the separate and pooled two-dose dose-response groups.<sup>9</sup> The power of this study is determined by the confidence limits for the NMB achieved following the second dose of atracurium.  $P < 0.05$  was considered statistically significant. Mean values are expressed with SEM, or in case of log-scale with 1 SD range. For the single-dose dose-response curve, 1 SD is expressed so that the 95% confidence limits would represent the range of 2 SD.

### Results

The mean onset time of atracurium induced block after the initial dose (time from administration to maximum effect) was  $5.3 \pm 0.8$  min (mean  $\pm$  SEM). Three unchanged train-of-four responses were monitored before the second atracurium dose was administered. The maximal NMB was obtained  $2.4 \pm 0.5$  min after the second dose. This time was not dependent on the amount of the first dose. Thereafter the NMB remained unchanged for  $4.3 \pm 0.1$  min before it began to recover.

The effects of the first doses of atracurium are shown

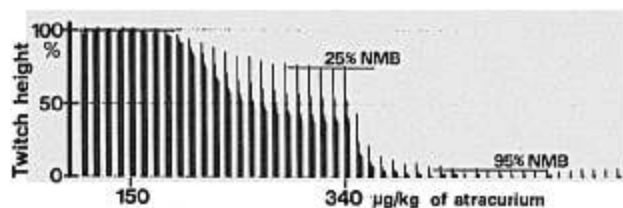

FIG. 1. An individual evoked EMG recording from a patient given two doses of atracurium. The first dose was 150  $\mu\text{g}/\text{kg}$  and the second dose was 190  $\mu\text{g}/\text{kg}$  (total dose 340  $\mu\text{g}/\text{kg}$ ). The maximum neuromuscular responses following atracurium were 25% and 95% NMB, respectively.

in table 1. One SD range of the NMB produced by 105, 150, 210, and 300  $\mu\text{g}/\text{kg}$  of atracurium was 9–30%, 16–60%, 64–84%, and 82–96%, respectively. The patients given 300  $\mu\text{g}/\text{kg}$  of atracurium as the first dose did not receive the second dose because their maximum NMB became  $>90\%$  after the first dose (table 1).

The  $\text{ED}_{50}$  and  $\text{ED}_{95}$ , calculated from the single-dose dose-response curves, were 164 (SD range, 150–179) and

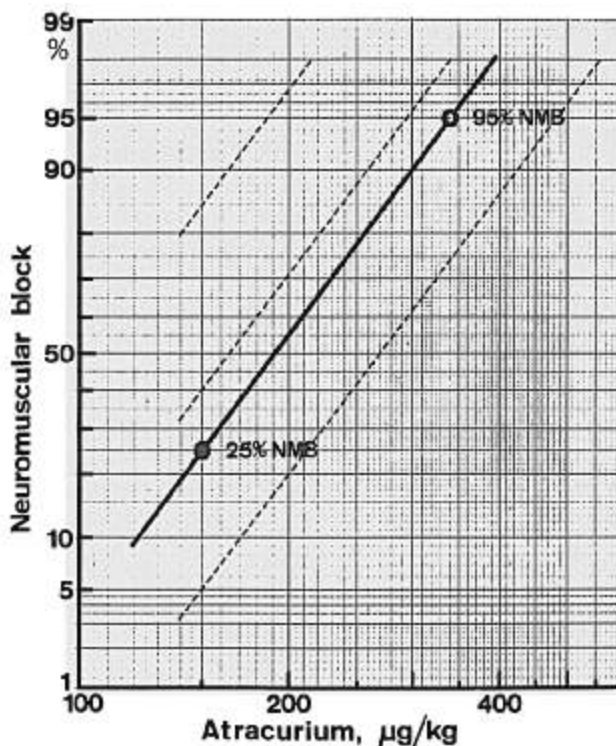

FIG. 2. The log-probit paper for plotting the individual dose-response relationship of atracurium. Broken lines have a slope of 6.5 probit/log. The 25% NMB response following the 150  $\mu\text{g}/\text{kg}$  atracurium dose of the figure 1 patient is marked with closed circle. A line drawn *via* this circle and parallel to the broken lines crosses the 95% NMB response at the dose level of 340  $\mu\text{g}/\text{kg}$ . Therefore, the second atracurium dose was 190  $\mu\text{g}/\text{kg}$ . The subsequent NMB was exactly 95% (open circle). The line drawn *via* the circles is the individual two-dose dose-response curve.

TABLE 1. The Neuromuscular Block Achieved Following Administration of Atracurium

| First Dose |       |           | Total Dose |          |            |
|------------|-------|-----------|------------|----------|------------|
| N          | µg/kg | NMB (%)   | N          | µg/kg    | NMB (%)    |
| 10         | 105   | 17 ± 4    | 10         | 271 ± 12 | 95.8 ± 0.6 |
| 30         | 150   | 35 ± 4    | 30         | 321 ± 12 | 95.7 ± 0.5 |
| 10         | 210   | 75 ± 3    | 10         | 306 ± 10 | 94.6 ± 0.5 |
| 10         | 300   | 91 ± 2    | —          | —        | —          |
| ANOVA      |       | P = 0.000 | NS         |          | NS         |

The values are mean ± SEM. Total dose is the sum of the first dose and the individual second dose.

336 (SD range, 274–411) µg/kg, respectively. The slope of the single-dose dose–response curve was 5.4 (4.5–6.4) probit/log (table 2; fig. 3).

The average maximal NMB after the individual second dose of atracurium was 95.5 ± 0.3%, without any difference between the three patient groups (table 1; fig. 4). In these 50 patients given second atracurium dose the maximum response was 6.695 probits with an SD of 0.25 probits. At 95% NMB (6.645 probits) the power to detect a difference of 0.10 probits is<sup>10</sup>: (standardized normal deviate) × (–1.645 + 0.1 × √50/0.25) = (standardized normal deviate) × (1.183) = 88%, or a beta error of 12%. Thus, there would be a 12% chance of failing to detect a difference from the precalculated 95% NMB if the mean maximum NMB following the second atracurium dose had been <93.88% (0.1 probits < 95% NMB) or >95.95% (0.1 probits > 95% NMB).

The slopes of the two-dose dose–response curves and the ED<sub>50</sub> and ED<sub>95</sub> values (calculated on the basis of both body weight and body surface area) were comparable between the three patient groups (table 2; fig. 4). The values of any two-dose dose–response group did not differ from the values produced by the single-dose dose–response technique. When the average ED values of all 50 patients given two doses of atracurium were calculated, they were

almost identical with those obtained by the single-dose technique (table 2). Also, the slope of the average two-dose dose–response curve was similar to the slope of the single-dose dose–response curve (table 2).

### Discussion

This investigation suggests that it is possible to create an individual dose–response curve of atracurium using only one predetermined dose and one increment individually calculated to produce a 95% NMB. By this method in an average of 8.5 min an individual dose–response curve could be drawn, from which it might be possible to determine the individual slope of the curve and the ED<sub>50</sub> and ED<sub>95</sub> of atracurium.

In children and adults, the distribution and elimination half-lives of atracurium are 2–3 and 19–20 min, respectively,<sup>11–13</sup> and the onset time (time between administration and maximum effect) is 6–7 min.<sup>6,14,15</sup> Therefore, if the cumulative dose dose–response curves are created by the method described by Donlon *et al.*,<sup>5</sup> it is not possible to prevent elimination of the first doses at the time of maximum EMG response following the later doses. Consequently, the calculated ED<sub>95</sub> becomes too large and the slope of the dose–response curve becomes too small.

If the dose–response curve of atracurium or vecuronium is created by the single-dose technique, hundreds of patients would have to be studied if several patient groups were to be compared with each other. Therefore, it is valuable to have a reliable technique that may be used to construct an individual dose–response curve for every patient. This technique would be extremely valuable in determining individual response to NMB drugs in patients in whom an unpredictable response to NMB agents is likely.

The average onset time of the first atracurium dose in the present study was 5.3 min, which is similar to that documented in adults.<sup>6,14,15</sup> Interestingly, the time elapsed between injection of the second atracurium dose and its

TABLE 2. ED<sub>50</sub>, ED<sub>95</sub>, and the Slope of the Dose–Response Curve for Atracurium in the Study Groups

| First Dose (µg/kg) | N  | ED <sub>50</sub> (µg/kg) | ED <sub>95</sub> (µg/kg) | ED <sub>50</sub> (mg/m <sup>2</sup> ) | ED <sub>95</sub> (mg/m <sup>2</sup> ) | Slope (probit/log) |
|--------------------|----|--------------------------|--------------------------|---------------------------------------|---------------------------------------|--------------------|
| 105                | 10 | 146<br>(126–169)         | 261<br>(223–305)         | 4.1<br>(3.4–5.0)                      | 7.4<br>(6.1–9.0)                      | 6.5<br>(6.0–7.0)   |
| 150                | 30 | 168<br>(132–215)         | 312<br>(258–378)         | 4.4<br>(3.3–5.9)                      | 8.2<br>(6.4–10.5)                     | 6.3<br>(5.3–7.3)   |
| 210                | 10 | 149<br>(117–190)         | 315<br>(279–356)         | 3.7<br>(2.8–4.9)                      | 7.8<br>(6.3–9.7)                      | 5.7<br>(4.2–7.2)   |
| Two-dose           | 50 | 160<br>(126–201)         | 302<br>(251–363)         | 4.2<br>(3.2–5.6)                      | 8.0<br>(6.3–10.0)                     | 6.2<br>(5.2–7.2)   |
| Single-dose        | 60 | 164<br>(150–179)         | 336<br>(274–411)         | 4.5<br>(4.2–4.9)                      | 8.6<br>(6.9–10.5)                     | 5.4<br>(4.5–6.4)   |
| P                  |    | NS                       | NS                       | NS                                    | NS                                    | NS                 |

The values are expressed as means, with 1 SD range given in parentheses.

maximal effect was only 2.4 min. Because the maximum NMB remained unchanged for an average of 4.3 min following the second atracurium dose, it is unlikely that the effect from the first dose had disappeared at the time of maximal NMB from the second dose. This is consistent with the finding that the slopes of the two-dose dose-response curves were not less than the slope of the single-dose dose-response curve (figs. 3 and 4). Furthermore, the maximum 95.5% NMB following the second atracurium dose was close to the precalculated level of 95%.

There were no differences in the slopes or ED<sub>50</sub> or ED<sub>95</sub> values between the present single-dose dose-response curve and any of the two-dose dose-response curves, even though the values were calculated on the basis of either body weight or body surface area. The slope, ED<sub>50</sub> and ED<sub>95</sub> values in our study are similar to those obtained by Brandom *et al.* in children 2-10 years of age.<sup>16,17</sup> Goudsouzian *et al.*, using the tension measurement in children 1-9 years of age, found identical ED<sub>50</sub> but somewhat smaller ED<sub>95</sub>.<sup>18</sup>

For statistical purposes, three types of comparisons were made: 1) The ED<sub>50</sub> and ED<sub>95</sub> values and the slopes of the dose-response curves were compared among the three groups of patients given two doses of atracurium. No differences were found by using ANOVA. 2) The mean ED<sub>50</sub> and ED<sub>95</sub> values and the slope of the dose-response curves of all the 50 patients given two atracurium doses were compared with the respective values derived by the single-dose dose-response technique. The values were almost identical (table 2). That the patients receiving the two-dose technique were also included in the single-dose group should not affect the slopes of the dose-response curves or the maximum response following the second atracurium dose. It may, however, reduce the difference especially between the ED<sub>50</sub> values derived by different techniques. 3) The mean ED<sub>50</sub> and ED<sub>95</sub> values and the slopes of the dose-response curves of each two-dose technique group were compared with the respective values derived by the single-dose dose-response technique. No statistical differences were noted. Because the nature of the single-dose technique is such that a type II error analysis cannot be carried out, we determined the power of the study on the basis of maximal recorded response following the second atracurium dose. The chance of failing to detect even minor difference from the targeted 95% NMB was minimal.

When compared with the single-dose results, the ED<sub>95</sub> tended to be somewhat smaller and the slope of the dose-response curve somewhat steeper in patients given the smallest initial atracurium dose. The direction of these changes is opposite to those found by using a cumulative dose dose-response technique. This tendency has to be reevaluated in larger patient populations in future "screening" studies before the two-dose technique is ap-

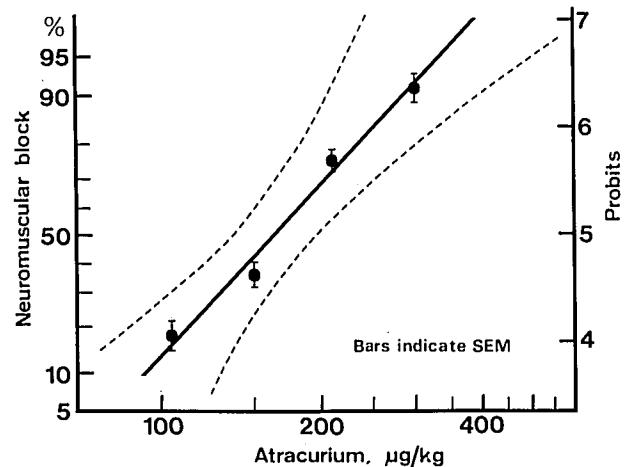

FIG. 3. The single-dose dose-response curve for atracurium. The 95% confidence limits are shown by broken lines. Calculated ED<sub>95</sub> is 336 µg/kg.

plied to evaluate pharmacodynamic characteristics of new NMB agents or new disease states. This is especially important because the slope of the dose-response curve may vary between different NMB agents and between individual patients.<sup>19,20</sup>

A two-dose technique described here may be useful in several situations. First, for studies involving an NMB agent with intermediate duration of effect in small groups of patients, it is possible to construct a dose-response curve for each patient and to calculate the mean slope, ED<sub>50</sub>

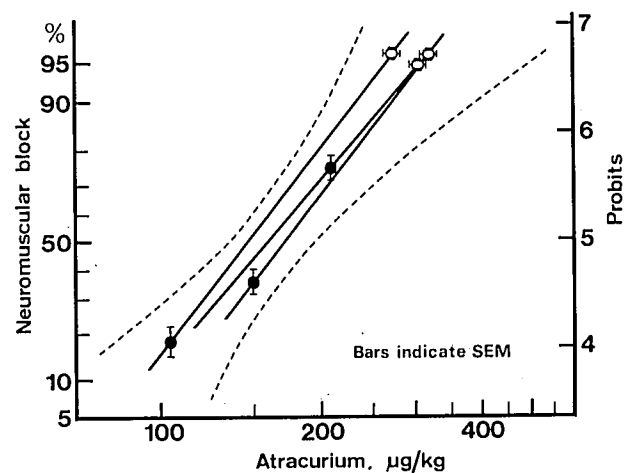

FIG. 4. The average two-dose dose-response curves for atracurium in the three patient groups given either 105, 150, or 210 µg/kg of atracurium as the first dose. Mean neuromuscular responses following the first and second doses of atracurium are marked with closed and open circles, respectively. Broken lines indicate the 95% confidence limits of the single-dose dose-response curve (see fig. 3). There are no differences between the calculated ED<sub>50</sub>s, ED<sub>95</sub>s, and the slopes of these dose-response curves.

and ED<sub>95</sub> of all patients. Second, if an individual patient does not manifest the estimated NMB after administration of the first dose of atracurium, it would be possible to give a second dose that will produce the level of NMB desired. This is possible by using log-probit paper on which the slopes of the dose-response curves are drawn, as in figure 2. Third, the following method can be used in a patient with unpredictable response to NMB agents: the first atracurium dose might be 50 µg/kg. Thereafter, succeeding doses are doubled and administered every 2–3 min until a recordable NMB is achieved. The final dose is then determined from the graph, as in figure 2. The maximum number of doses would be 3 or 4 (the third and fourth logarithmic doses are 200 and 400 µg/kg, respectively), and the time to reach the 95% NMB would not exceed 8–12 min. Concurrently, the last increment constitutes at least 50% of the total cumulative atracurium dose. In this way, the possible elimination of first doses at the time of maximum NMB following the last increment contributes only slightly on the individual dose-response curve.

This method is based on our findings that if the given dose of atracurium is to be effective, its effect becomes recordable in 1–3 min and the maximum neuromuscular effect is obtained in 3–7 min. The 6.5 probit/log slope of the dose-response curve means that when the total dose of atracurium is doubled, it produces a 2.0 probit change in the NMB. This probit change is comparable to an increase in NMB from *e.g.*, 4% to 60% or from 40% to 96%. Therefore, it is not necessary to wait for the maximum effect of a slight neuromuscular response because doubling the dose does not produce an unpredictable profound NMB. We did not use any volatile inhalational agents, but these agents have not been found to alter the slope of the dose-response curves of muscle relaxants.<sup>14,16,18</sup>

In conclusion, we have developed a reliable method for determining individual dose-response curve for atracurium. From this curve it is possible to calculate the individual slope of the curve and the individual ED<sub>50</sub> and ED<sub>95</sub> values. This two-dose technique may in all likelihood be used in adults and in pediatric patients when the objective is to determine the individual response to an NMB agent having intermediate duration of effect.

### References

1. Katz RL, Stirt J, Murray AL, Lee C: Neuromuscular effects of atracurium in man. *Anesth Analg* 61:730–734, 1982
2. Fisher DM, Fahey MR, Cronnelly R, Miller RD: Potency determination of vecuronium (ORG NC45): Comparison of cumulative and single-dose techniques. *ANESTHESIOLOGY* 57:309–310, 1982
3. Gibson FM, Mirakhor RK, Lavery GG, Clarke RSJ: Potency of atracurium: A comparison of single dose and cumulative dose techniques. *ANESTHESIOLOGY* 62:657–659, 1985
4. Ording H, Skovgaard LT, Engbaek J, Viby-Mogensen J: Dose-response curves for vecuronium during halothane and neurolept anaesthesia: Single bolus versus cumulative method. *Acta Anaesthesiol Scand* 29:121–124, 1985
5. Donlon JV, Savarese JJ, Ali HH, Teplik RS: Human dose-response curves for neuromuscular blocking drugs: A comparison of two methods of construction and analysis. *ANESTHESIOLOGY* 53:161–166, 1980
6. Basta SJ, Ali HH, Savarese JJ, Sunder N, Gionfriddo M, Cloutier G, Lineberry C, Cato AE: Clinical pharmacology of atracurium besylate (BW 33A): A new non-depolarizing muscle relaxant. *Anesth Analg* 61:723–729, 1982
7. Gramstad L, Lilleasen P: Dose-response relation for atracurium, ORG NC45 and pancuronium. *Br J Anaesth* 54:647–650, 1982
8. Meretoja OA, Wirtavuori K, Neuvonen PJ: Age-dependence of the dose-response curve of vecuronium in pediatric patients during balanced anaesthesia. *Anesth Analg* 67:21–26, 1988
9. Litchfield JT Jr, Wilcoxon F: A simplified method of evaluating dose-effect experiments. *J Pharmacol Exp Ther* 53:99–113, 1949
10. Rosner B: *Fundamentals of Biostatistics*. Boston, Duxbury Press, 1982, pp 183–189
11. Weatherley BC, Williams SG, Neill EAM: Pharmacokinetics, pharmacodynamics and dose-response relationships of atracurium administered i.v. *Br J Anaesth* 55(suppl):39–45, 1983
12. Brandom BW, Stiller RL, Cook DR, Woelfel SK, Chakravorti S, Lai A: Pharmacokinetics of atracurium in anaesthetized infants and children. *Br J Anaesth* 58:1210–1213, 1986
13. Ward S, Boheimer N, Weatherley BC, Simmonds RJ, Dopson TA: Pharmacokinetics of atracurium and its metabolites in patients with normal renal function, and in patients in renal failure. *Br J Anaesth* 59:697–706, 1987
14. Rupp SM, McChristian JW, Miller RD: Neuromuscular effects of atracurium during halothane-nitrous oxide and enflurane-nitrous oxide anaesthesia in humans. *ANESTHESIOLOGY* 63:16–19, 1985
15. Healy TE, Pugh ND, Sivalingam KT, Petts HV: Atracurium and vecuronium: Effect of dose on the time of onset. *Br J Anaesth* 58:620–624, 1986
16. Brandom BW, Rudd GD, Cook DR: Clinical pharmacology of atracurium in paediatric patients. *Br J Anaesth* 55(suppl):117–121, 1983
17. Brandom BW, Woelfel SK, Cook DR, Fehr BL, Rudd GD: Clinical pharmacology of atracurium in infants. *Anesth Analg* 63:309–312, 1984
18. Goudsouzian N, Liu LMP, Gionfriddo M, Rudd GD: Neuromuscular effects of atracurium in infants and children. *ANESTHESIOLOGY* 62:75–79, 1985
19. Donlon JV, Ali HH, Savarese JJ: A new approach to the study of four nondepolarizing relaxants in man. *Anesth Analg* 53:934–938, 1974
20. Shanks CA, Walker JS, Ramzan MI, Triggs EJ: Dose-response curves for four neuromuscular blockers using continuous i.v. infusion. *Br J Anaesth* 53:627–633, 1981
